# Supplementary material for: Dimensional Control of DNA Nanostructures Enhances Cellular Uptake and Guides Tissue-Regenerative Responses
Source: Research Square preprint supplement (doi:10.21203/rs.3.rs-7170660/v1), 2025-07-29
Supplement: Supplementary file 1 [file cb7e87f5315715576741fc44.docx]

Supporting Information

# Table S1. Sequences of DNs used in this study

| **Six helix bundle** | |
| --- | --- |
| Name | Sequence (5’-3’) |
| helix-0 | TTTAGTGCCGATTCATTAATGCAGCTGGCACGACAGGTATCCCGACA |
| helix-1 | TTTCTAGGCGCTGCAGTGAGCGCAACGCAATTAATGTGAGCCAGCTTT |
| helix-2 | TTTCATCAGACACCCCAGGCTTTACACTTTATGCTTCGCAGGTTGTTT |
| helix-3 | TTTTGCCAGGCTGAGTGGATAACAAGTTCACACAGGCAGCAGCTG |
| helix-4 | TTTACCACGCTCACGAATTCGAGCTCGGTACCCGGGGATGCTGACTTT |
| helix-5 | TTTGACGCCATGCGTATACGGTCGCTAGCGGACTTGCCTCACTACTTT |
| helix-s-a | TTTTGTCGGGATGGCGTCGTCAGCATCCCCGGCACTCAGCGAAGCA |
| helix-s-b | ATTGCGTTAAAGCCGTGAACTTGTTATCGTACCGACGACCGT |
| helix-s-c | CGCCTAGCAACCTGCCTGGCA |
| helix-s-d | TAAAGTGTGCGCTCCGTGCCAGCTGCATCCGCTAGGCTCGAA |
| helix-s-e | CAGCTGCGCGTGGTGTAGTGAGGCAAGTTAATGAACACATTA |
| helix-s-e-Alexa 647 | / 5Alexa 647/ CAGCTGCGCGTGGTGTAGTGAGGCAAGTTAATGAACACATTA |
| helix-s-f | TTCGTGATGCCTGTTGGGGTGTCTGATGGCTGGCTTCGGCACT |
| helix-s-g | ATACGCATACCTGTACTGCAG |
| **Three point star** | |
| Name | Sequence (5’-3’) |
| Star-Center | AGGCATATTGAATCGTTTACAGGATTAGTAATTAACAGCTTTAATATCATCGCCCATCGTAGGTTTCTTGCC |
| Star-E-a-N3 | CCACCTTAACACGCGATGATATTGCTGTTAATTAGGCTCGGT |
| Star-E-a | CCACCTTAACACGCGATGATATTGCTGTTAATTAGGCTCGGT |
| Star-E-b | CGATGTTGACGGACTAATCCTGTCGATTCAATATCTGTCGTC |
| Star-E-c | CGCCTAGCAACCTGCCTGGCAAGCCTACGATGGACACGGTAA |
| Star-S-a | TTTGACGACAGAGGTTGCTAGGCG |
| Star-S-b | TTACCGTGTGTGTTAAGGTGG |
| Star-S-b-Alexa 647 | / 5Alexa 647/ TTACCGTGTGTGTTAAGGTGG |
| Star-S-c | ACCGAGCCTCCGTCAACATCG |
| **Tetrahedral DNA nanostructure** | |
| Name | Sequence (5’-3’) |
| A-1 | CCCTGTACTGGCTAGGAATTCACGTTTTAATCTGGGCTTTGGGTTAAGAAACTCCCCG |
| A-1-Alexa 647 | / 5Alexa 647/TACTGGCTAGGAATTCACGTTTTAATCTGGGCTTTGGGTTAAGAAACTCCCCG |
| A-2 | CGCTGGAGGCGCATCACCGTTTGCGTATGTGTTCTGTGCGGCCTGCCGTCCCGTGTGGG |
| B-1 | CGGTGATGCGCCTCCAGCGCGGGGAGTTTCTTAACCCTTTCCGACTTACAAGAGCCGG |
| B-2 | GCGAGACTCAGGTGGTGCCTTTGGCATTCGACCAGGAGATATCGCGTTCAGCTATGCCC |
| C-1 | CCCATGAGAATAATACCGCCGATTTACGTCAGTCCGGTTTCCCACACGGGACGGCAGGC |
| C-2 | CGCACAGAACACATACGCTTTGGGCATAGCTGAACGCGATATCTCCTGGTCGAATGCC |
| D-1 | GCCCAGATTAAAACGTGAATTCCTAGCCAGTACAGGGTTTCCGGACTGACGTAAATCGG |
| D-2 | CGGTATTATTCTCATGGGTTTGGCACCACCTGAGTCTCGCCCGGCTCTTGTAAGTCGG |

# Table S2. Primer sequences used in this study

| Gene | Forward | Reverse |
| --- | --- | --- |
| *GAPDH (Homo sapiens)* | CACCCACTCCTCCACCTTTG | CCACCACCCTGTTGCTGTAG |
| *Col I (Homo sapiens)* | AGTGGTTTGGATGGTGCCAA | GCACCATCATTTCCACGAGC |
| *Col III (Homo sapiens)* | CTTCTCTCCAGCCGAGCTTC | CCAGTGTGTTTCGTGCAACC |
| *bFGF (Homo sapiens)* | GGCTGCTACTTGGAGGCTTAT | AACACCTCCAGCATTTCGGT |
| *αSMA (Homo sapiens)* | CTTTGGCTTGGCTTGTCAGG | GTGCGGACAGGAATTGAAGC |
| *Aggrecan (Homo sapiens)* | CTTCCGCTGGTCAGATGGAC | CGTTTGTAGGTGGTGGCTGT |
| *Col II (Homo sapiens)* | TGGACGATCAGGCGAAACC | GCTGCGGATGCTCTCAATCT |
| *Sox9 (Homo sapiens)* | GGACCACCCGGATTACAAGT | AAGATGGCGTTGGGGGAGAT |
| *MMP13 (Homo sapiens)* | TGAGCTGGACTCATTGTCGG | GAGCCTCTCAGTCATGGAGC |
| *GAPDH (Mus musculus)* | TCAACGGCACAGTCAAG | ACTCCACGACATACTCAGC |
| *MyoD (Mus musculus)* | CCAGGACACGACTGCTTTCT | CAAGCCGTGAGAGTCGTCTT |
| *Myf5 (Mus musculus)* | CTTCGGAGCACACAAAGCTG | GGTTGACCTTCTTCAGGCGT |
| *MyoG (Mus musculus)* | CGGTGGAGGATATGTCTGTTG | GGTGTTAGCCTTATGTGAATGG |
| *Myh3 (Mus musculus)* | CTTCACCTCTAGCCGGATGGT | AATTGTCAGGAGCCACGAAAAT |


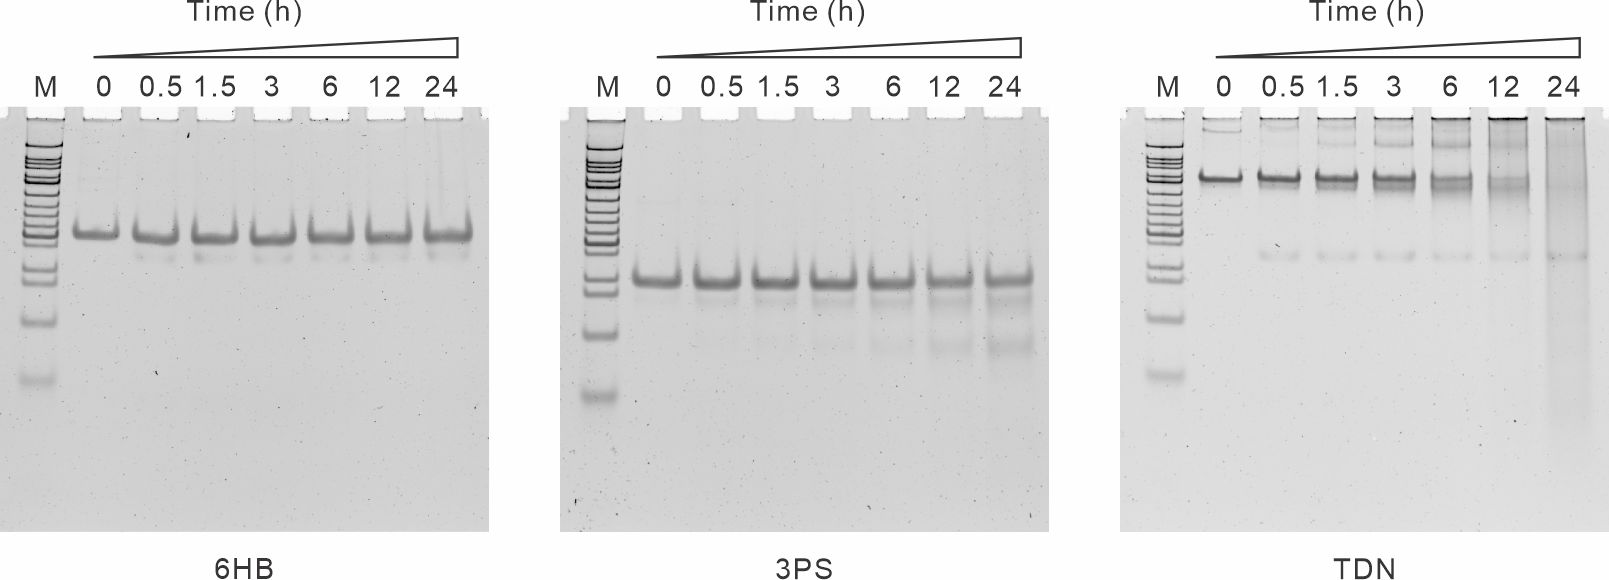


Figure S1. Stability of the DNA nanostructure (DN) in 10% FBS. DNs were incubated in DMEM medium with 10% FBS at 37 °C for 0, 1.5, 3, 6, 12, and 24 hours. The integrity of DNs was examined by non-denaturing 6% PAGE analysis. 6HB had the best stability among the three DNs, remaining above 95% after 24 hours.


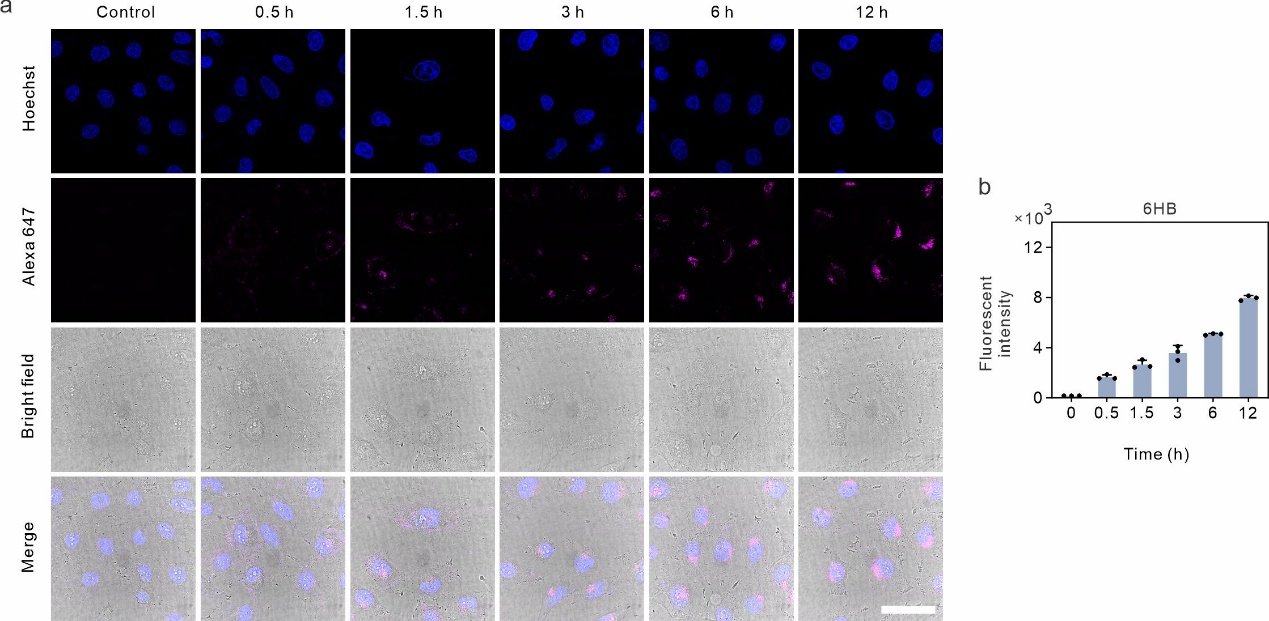


Figure. S2 Time-dependent cellular uptake of 6HB. a. Confocal images of HUVECs treated with 200 nM of Alexa 647 labelled 6HB for different periods of time (0.5 to 12 hours) at 37°C. Nontreated cells were studied as negative controls. Scale bar: 40 μm. b. Flow cytometry analysis of cellular uptake of Alexa 647-DNs. Quantification of the mean fluorescence intensities of cells was shown (n = 3 per group). Data are presented as the mean ± SD.


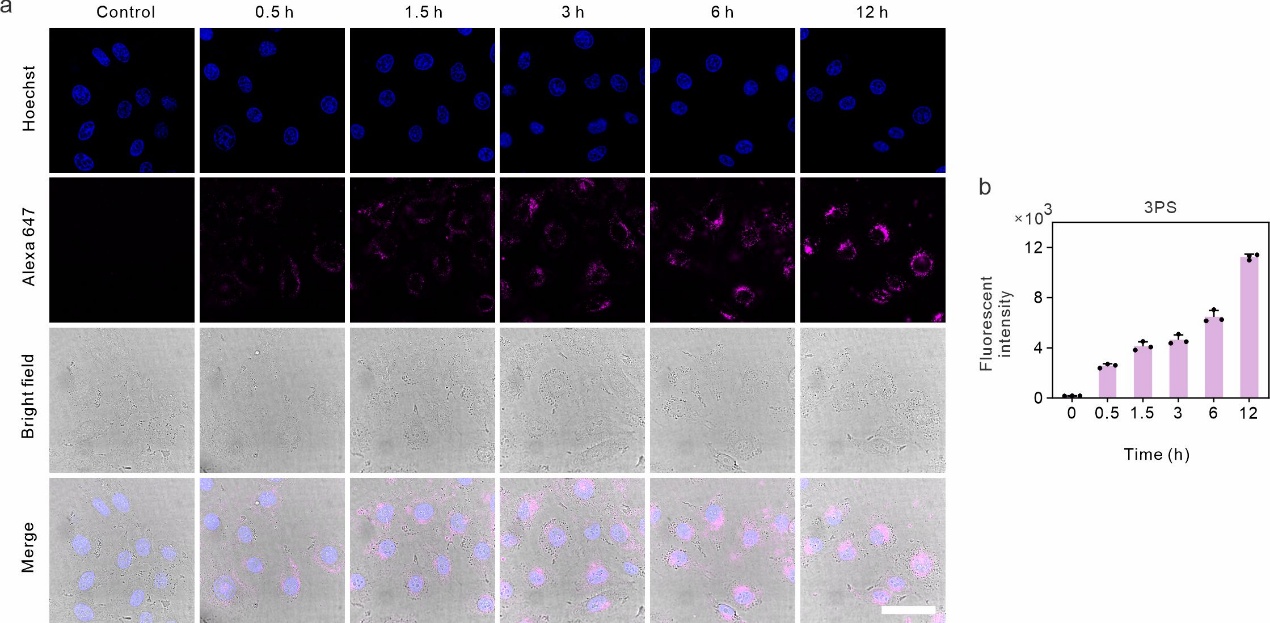


Figure. S3 Time-dependent cellular uptake of 3PS. a. Confocal images of HUVECs treated with 200 nM of Alexa 647 labelled 3PS for different periods of time (0.5 to 12 hours) at 37°C. Nontreated cells were studied as negative controls. Scale bar: 40 μm. b. Flow cytometry analysis of cellular uptake of Alexa 647-DNs. Quantification of the mean fluorescence intensities of cells was shown (n = 3 per group). Data are presented as the mean ± SD.


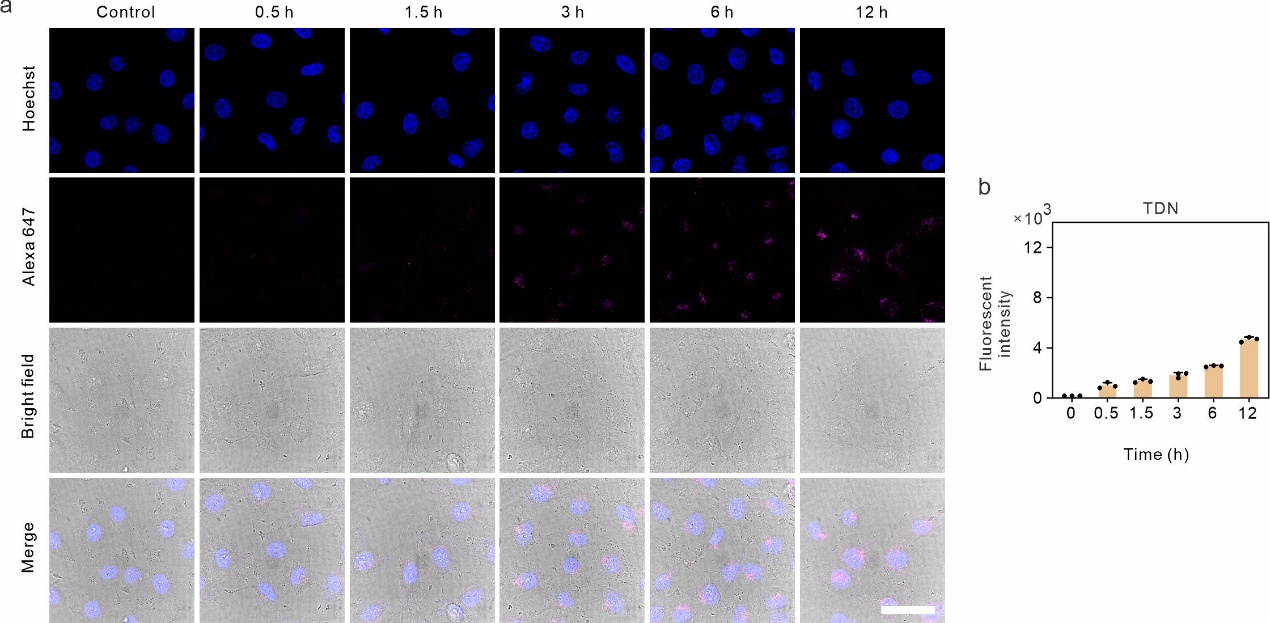


Figure. S4 Time-dependent cellular uptake of TDN. a. Confocal images of HUVECs treated with 200 nM of Alexa 647 labelled TDN for different periods of time (0.5 to 12 hours) at 37°C. Nontreated cells were studied as negative controls. Scale bar: 40 μm. b. Flow cytometry analysis of cellular uptake of Alexa 647-DNs. Quantification of the mean fluorescence intensities of cells was shown (n = 3 per group). Data are presented as the mean ± SD.


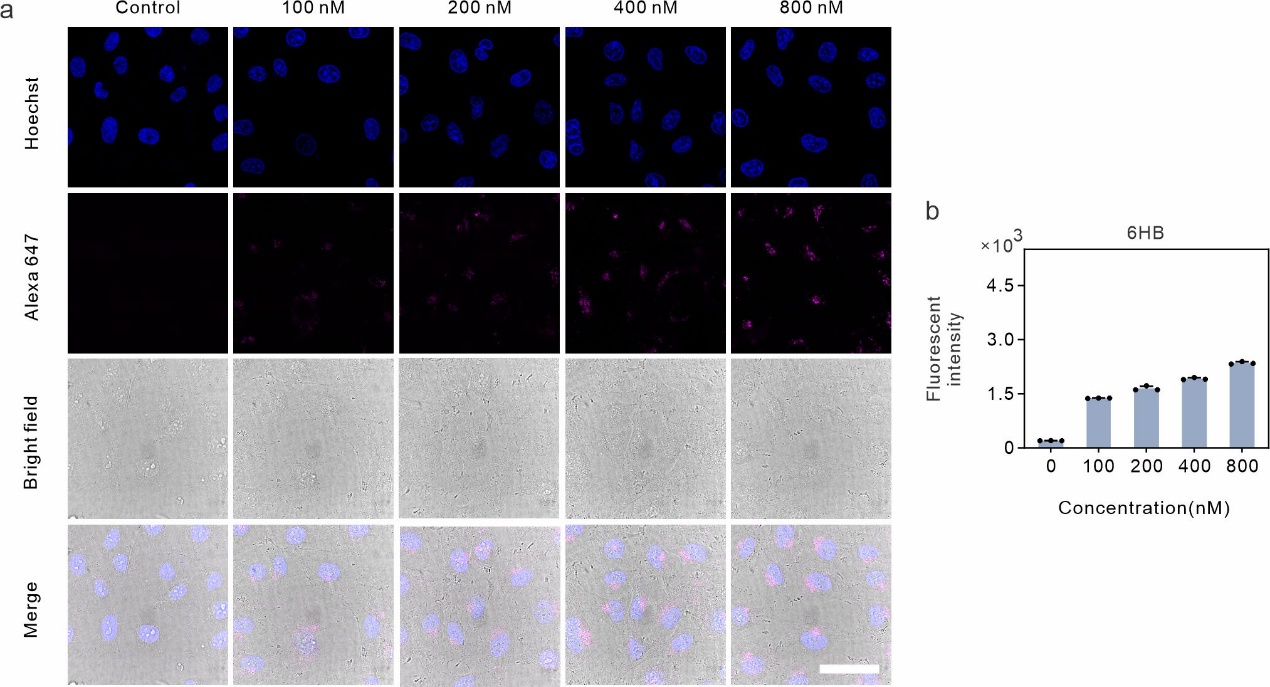


Figure. S5 Concentration-dependent cellular uptake of 6HB. a. Confocal images of HUVECs treated with different concentration (100 nM to 800 nM) of Alexa 647 labelled 6HB for 3 hours at 37°C. Nontreated cells were studied as negative controls. Scale bar: 40 μm. b. Flow cytometry analysis of cellular uptake of Alexa 647-DNs. Quantification of the mean fluorescence intensities of cells was shown (n = 3 per group). Data are presented as the mean ± SD.


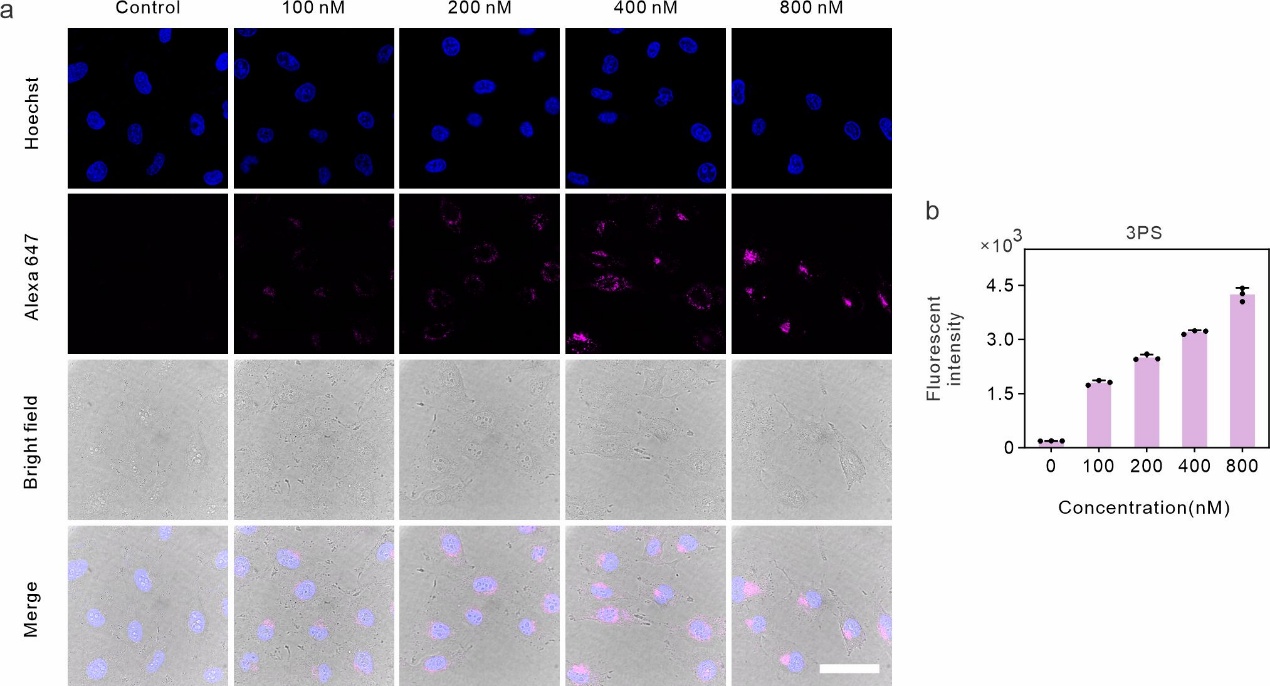


Figure. S6 Concentration-dependent cellular uptake of 3PS. a. Confocal images of HUVECs treated with different concentration (100 nM to 800 nM) of Alexa 647 labelled 3PS for 3 hours at 37°C. Nontreated cells were studied as negative controls. Scale bar: 40 μm. b. Flow cytometry analysis of cellular uptake of Alexa 647-DNs. Quantification of the mean fluorescence intensities of cells was shown (n = 3 per group). Data are presented as the mean ± SD.


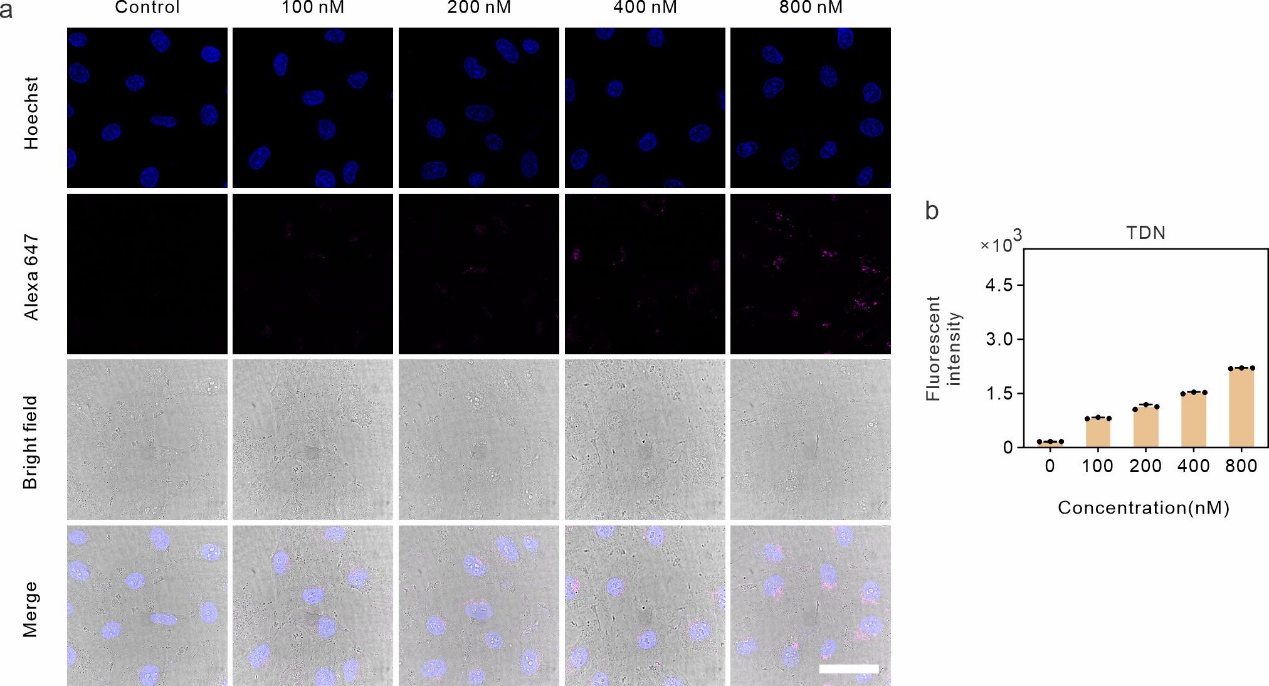


Figure. S7 Concentration-dependent cellular uptake of TDN. a. Confocal images of HUVECs treated with different concentration (100 nM to 800 nM) of Alexa 647 labelled TDN for 3 hours at 37°C. Nontreated cells were studied as negative controls. Scale bar: 40 μm. b. Flow cytometry analysis of cellular uptake of Alexa 647-DNs. Quantification of the mean fluorescence intensities of cells was shown (n = 3 per group). Data are presented as the mean ± SD.


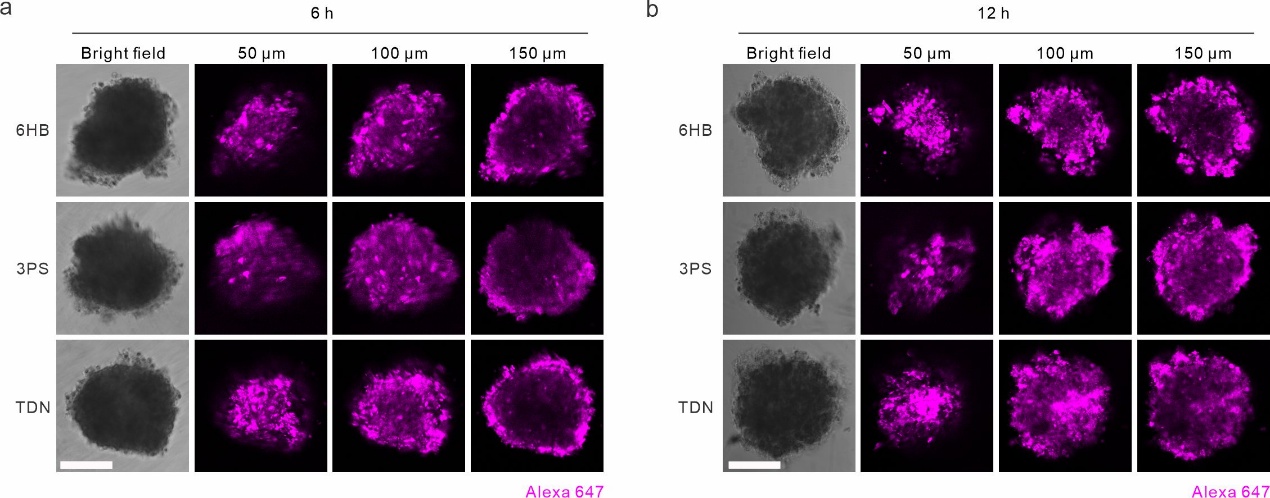


Figure. S8 3D cell invasion of DNs in the SW1353 spheroid model for 6 (a) and 12 (b) hours. All three structures penetrated to the inner layer after 12 hours. Scale bar: 200 μm.
